# Supplementary material
Source: publisher site journal article supplement (https://www.dovepress.com/article/365480)
Supplement: Supplementary file 1 [file get_supplementary_file.php]

**Characterization of patients with chronic obstructive pulmonary disease initiating single-inhaler long-acting muscarinic antagonist/long-acting β2-agonist dual therapy in a primary care setting in England**

Gema Requena,1 Victoria Banks,2 Alexandrosz Czira,1 Robert Wood,2 Theo Tritton,2 Rosie Wild,2 Chris Compton,1 Maria Duarte,1 Afisi S. Ismaila3,4

*1Value Evidence and Outcomes, Epidemiology, GlaxoSmithKline, R&D Global Medical, Brentford, Middlesex, UK; 2Real-world Evidence,Adelphi Real World, Bollington, Cheshire, UK; 3Value Evidence and Outcomes, GlaxoSmithKline, Collegeville, PA, USA; 4Department of Health Research Methods, Evidence and Impact, McMaster University, Hamilton, ON, Canada*

Correspondence: Gema Requena

Address: Epidemiology, Value Evidence and Outcomes, R&D Global Medical, GlaxoSmithKline, Brentford, Middlesex, UK

Tel: +44 20 80476893

Email: gema.x.requena@gsk.com

**Supplementary Materials**

**Supplementary Figure 1.** Respiratory therapies prescribed during the baseline period (non-triple users cohort)


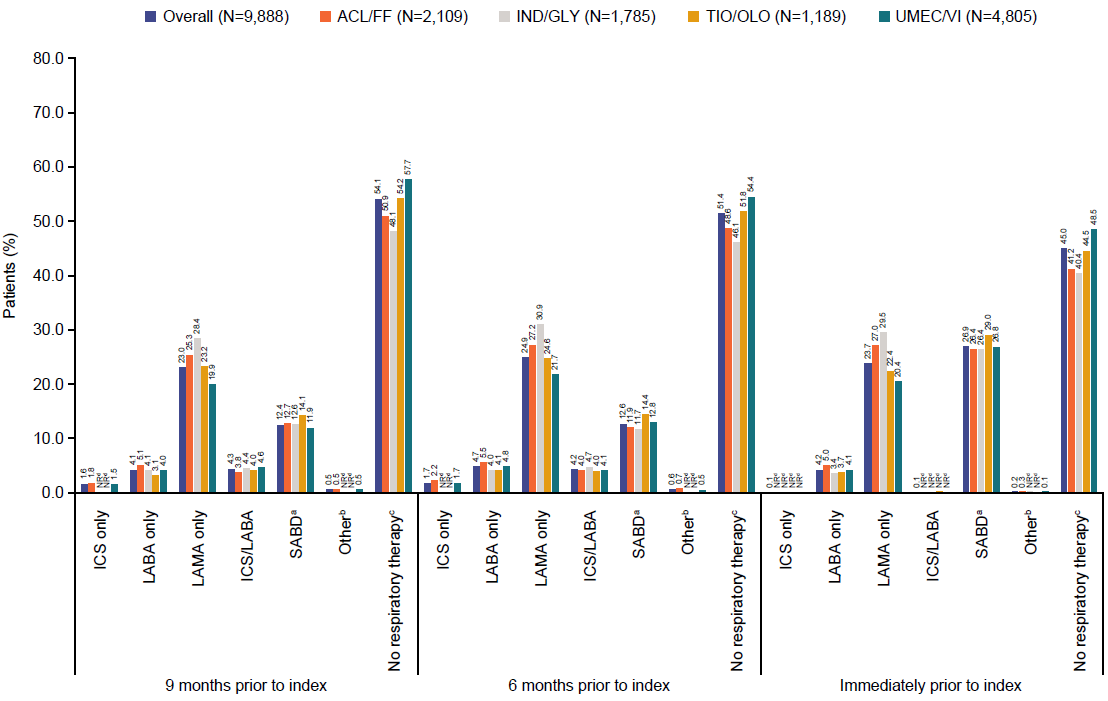


aIncluded treatment with SABA, SAMA or SABA/SAMA fixed and open combinations; bincluded phosphodiesterase-4 inhibitors, methylxanthines, and treatment combinations not reflected elsewhere; cno ICS, LABA, LAMA, ICS/LABA, SABD or Other category use;
dResults based on small numbers of patients (n<5) were suppressed, as well as the next-smallest value to protect primary suppression.

ACL, aclidinium; FF, formoterol fumarate; GLY, glycopyrronium; ICS, inhaled corticosteroid; IND, indacaterol; LABA, long-acting β2-agonist; LAMA, long-acting muscarinic antagonist; NR, not reported; OLO, olodaterol; SABA, short-acting β2-agonist; SABD, short-acting bronchodilator; SAMA, short-acting muscarinic antagonist; TIO, tiotropium bromide; UMEC, umeclidinium; VI, vilanterol.

**Supplementary Figure 2.** Mean number of respiratory therapies prescribed during the baseline period (non-triple users cohort)


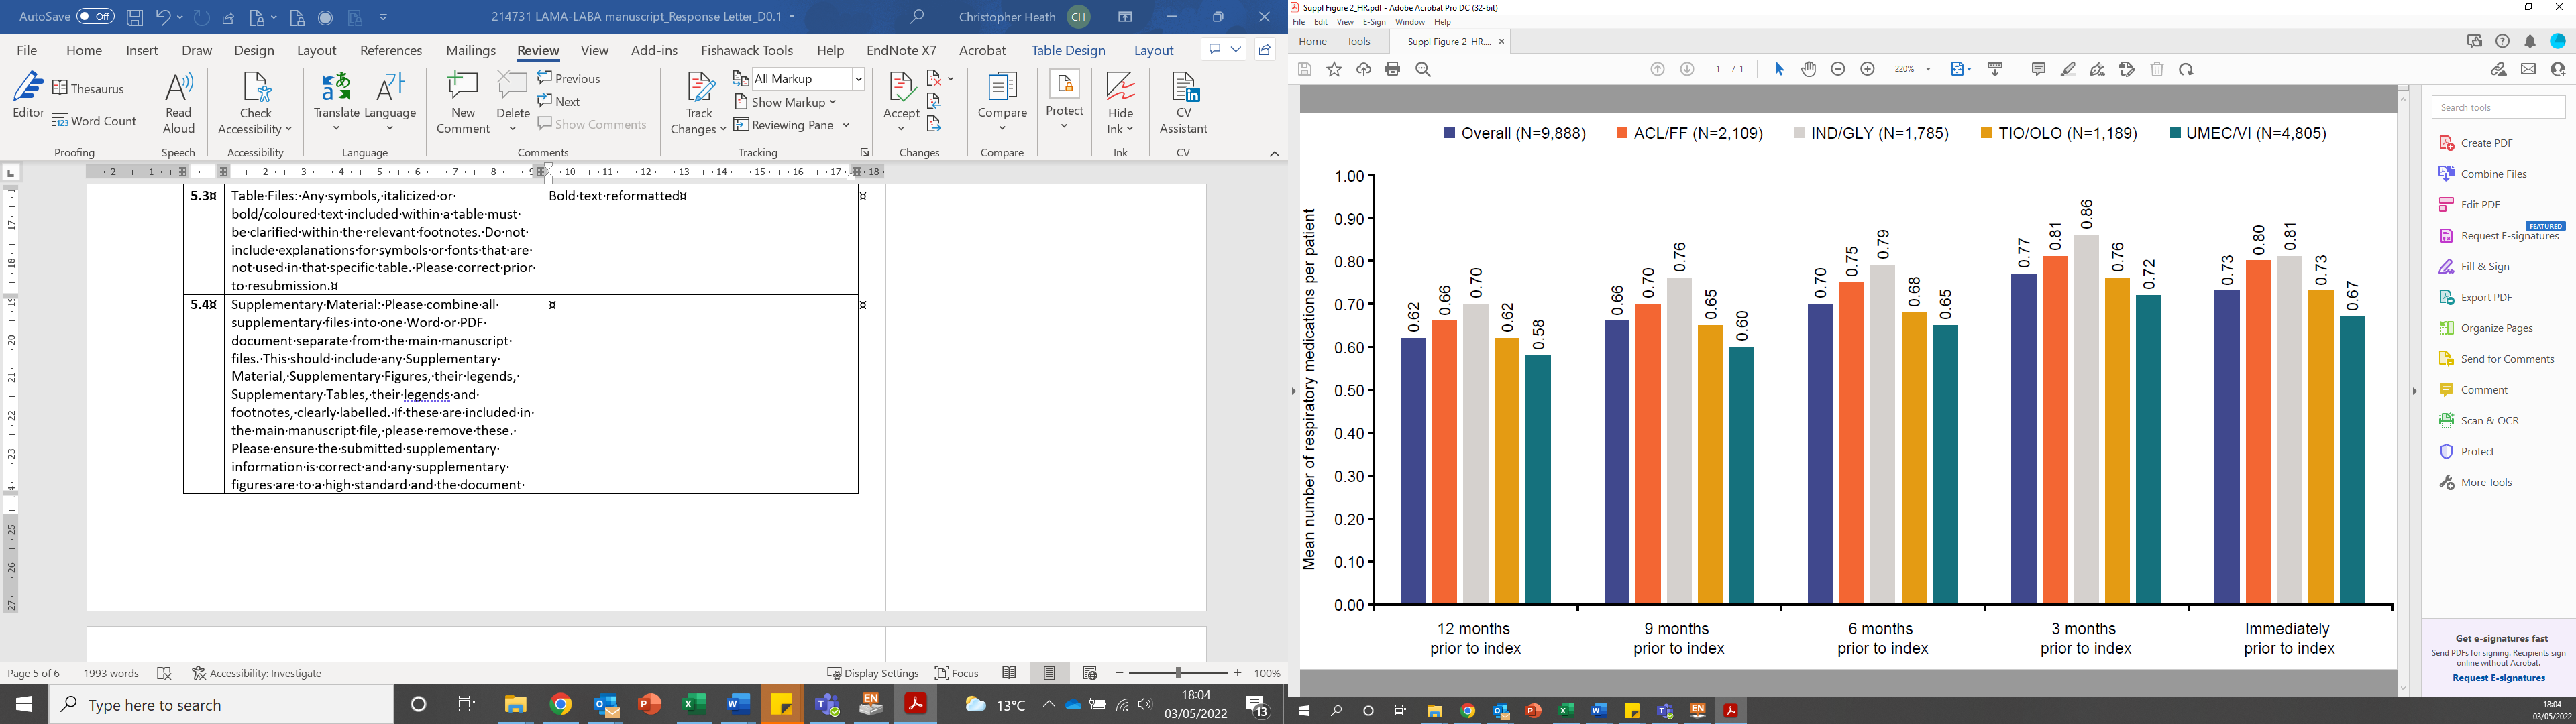


ACL, aclidinium; FF, formoterol fumarate; GLY, glycopyrronium; IND, indacaterol; OLO, olodaterol; TIO, tiotropium bromide; UMEC, umeclidinium; VI, vilanterol.

**Supplementary Figure 3.** All-cause HCRU during the baseline period (non-triple users cohort)


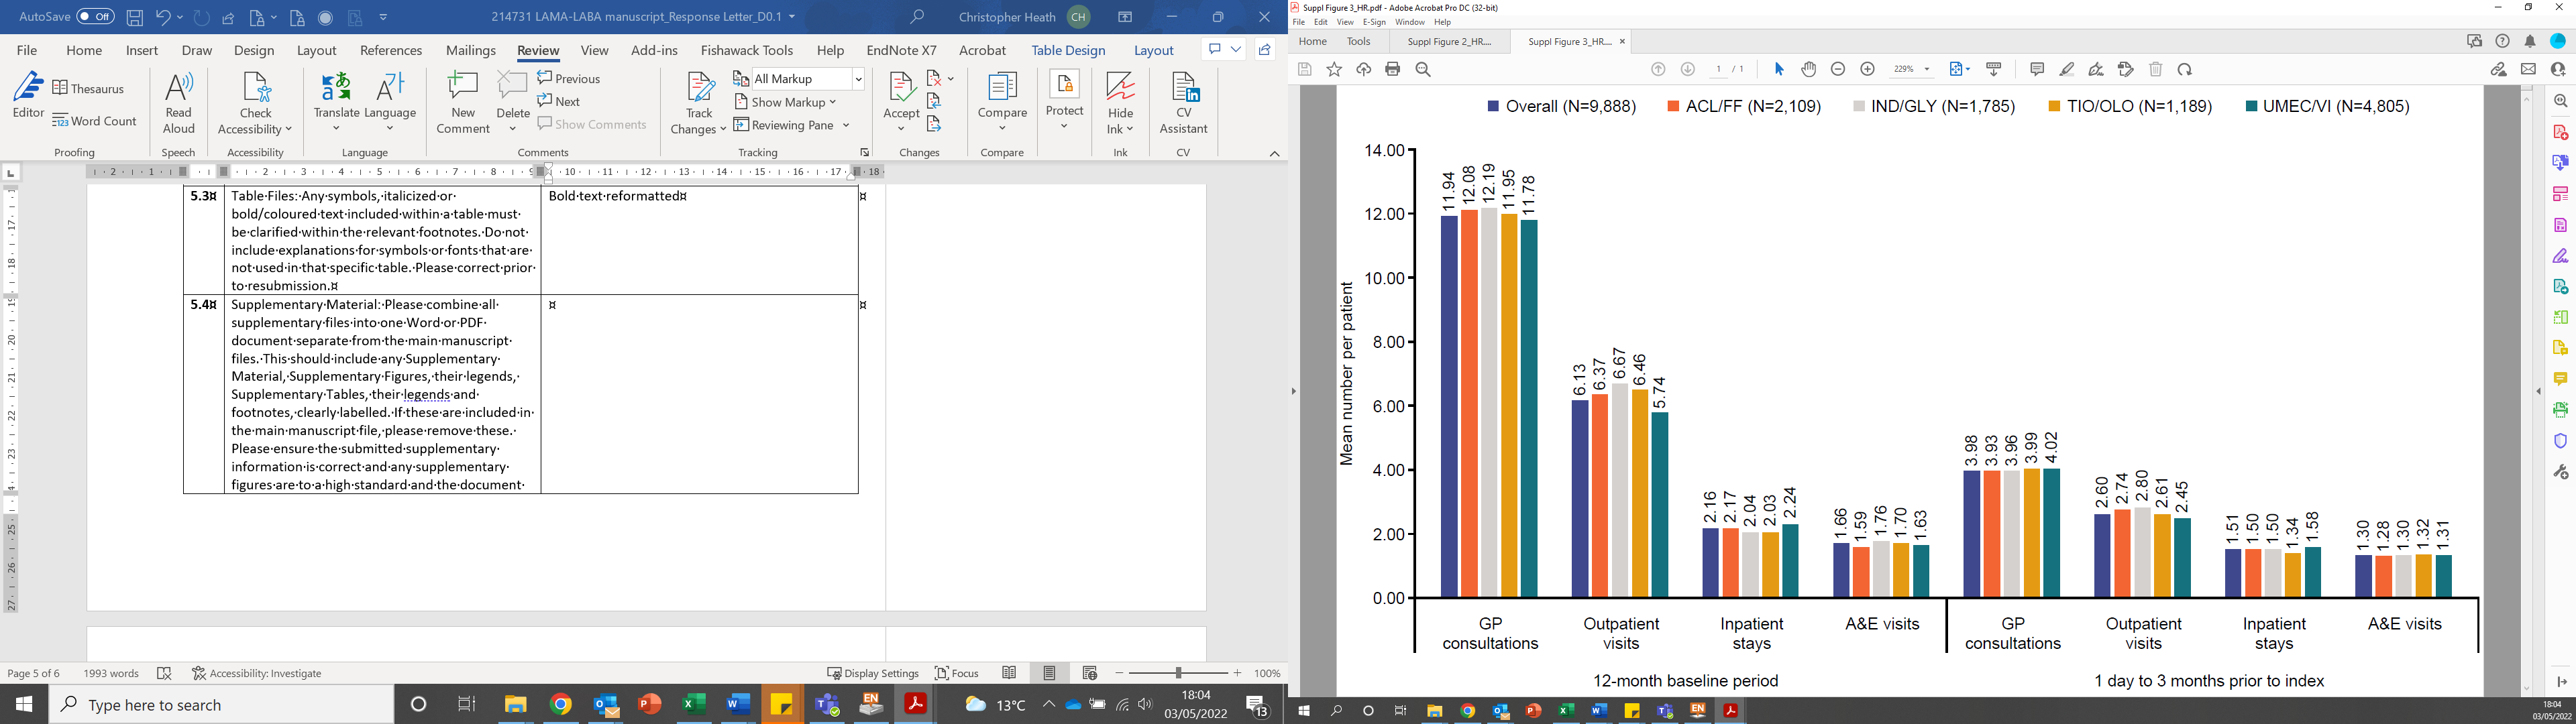


A&E, accident and emergency, ACL, aclidinium; FF, formoterol fumarate; GLY, glycopyrronium; GP, general practitioner; IND, indacaterol; OLO, olodaterol; TIO, tiotropium bromide; UMEC, umeclidinium; VI, vilanterol.

**Supplementary Figure 4**. All-cause costs during the baseline period (non-triple users cohort)


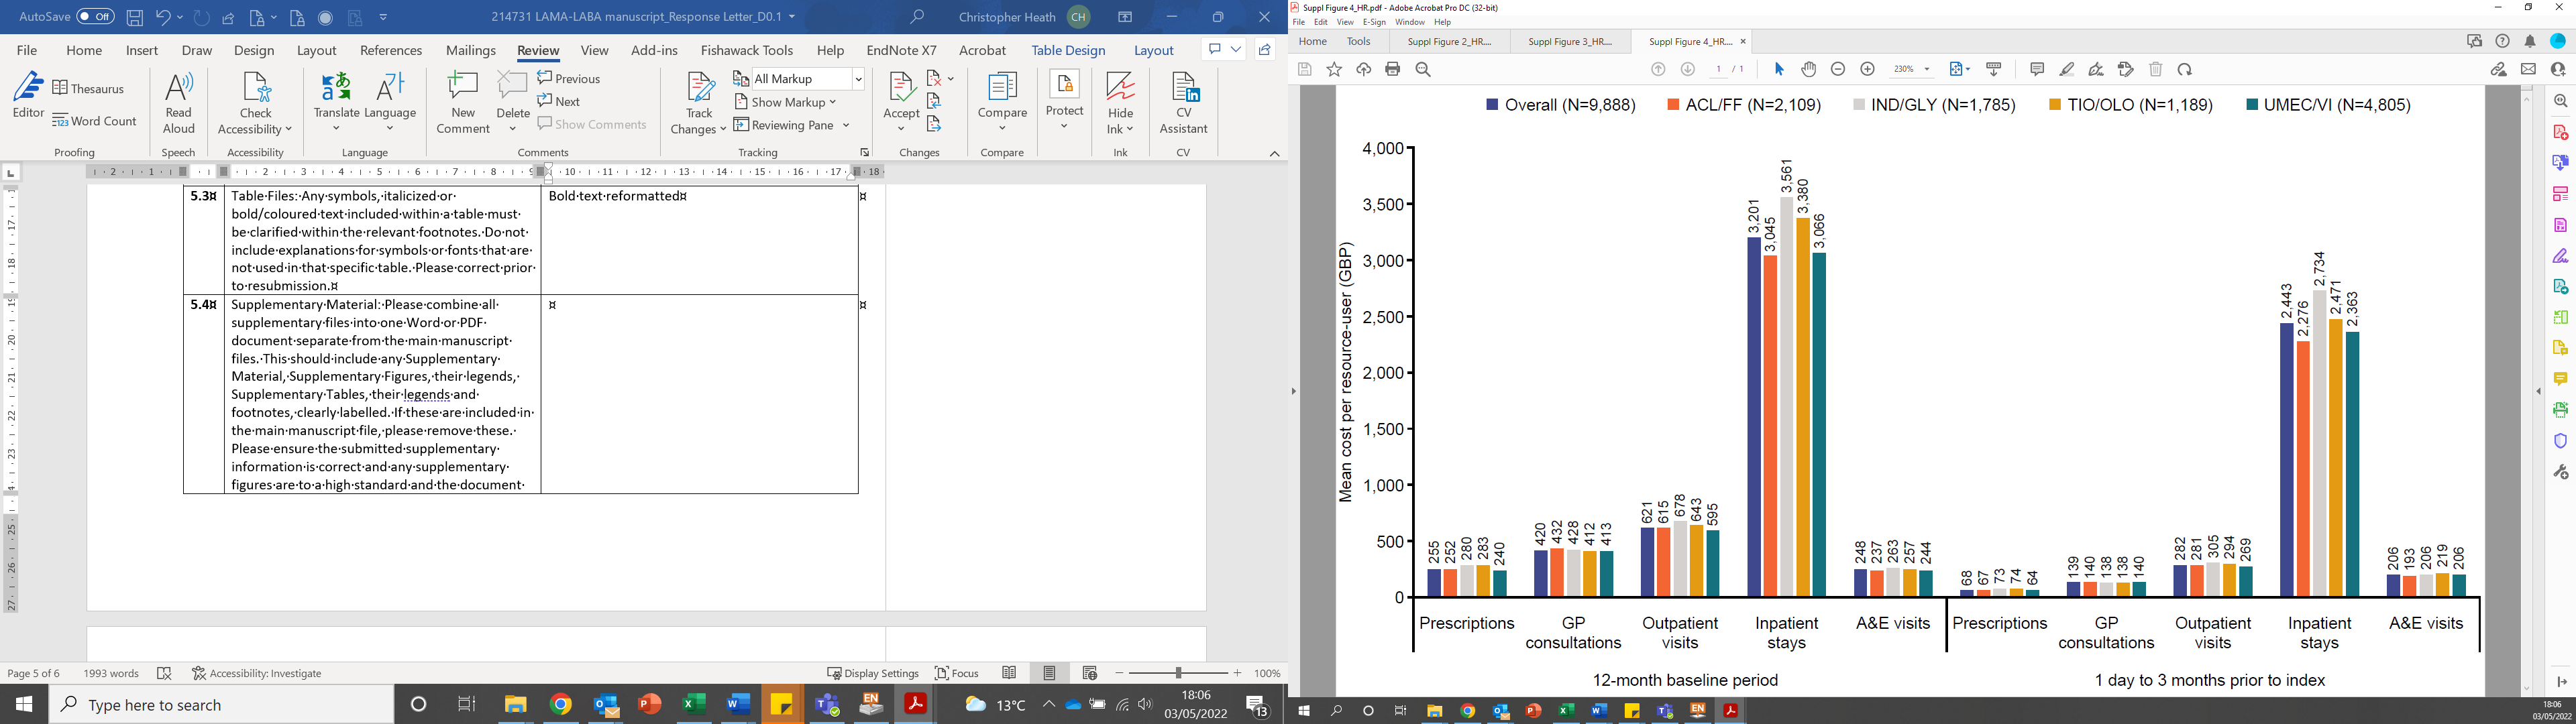


A&E, accident and emergency; ACL, aclidinium; FF, formoterol fumarate; GBP, British pound sterling; GLY, glycopyrronium; GP, general practitioner; IND, indacaterol; OLO, olodaterol; TIO, tiotropium bromide; UMEC, umeclidinium; VI, vilanterol.

**Supplementary Table 1.** CPRD diagnostic codes for COPD used in this study

| **Medical code ID** | **Term** |
| --- | --- |
| 909711000006111 | RFC COPD |
| 909721000006115 | RFC Emphysema |
| 1882421000006113 | 1 COPD exacerbation in past year |
| 1882441000006118 | 2 COPD exacerbations in past year |
| 1882431000006111 | ≥3 COPD exacerbations in past year |
| 424365019 | Acute infective exacerbation of chronic obstructive airways disease |
| 2010061000006113 | Acute non-infective exacerbation of COPD |
| 1823851000006119 | COPD confirmed |
| 11932331000006115 | COPD GOLD group A |
| 11932341000006113 | COPD GOLD group B |
| 11932351000006110 | COPD GOLD group C |
| 11932361000006112 | COPD GOLD group D |
| 977891000006112 | COPD A&E attendance since last visit |
| 977901000006111 | Emergency COPD admission since last appointment |
| 299001000000116 | COPD disturbs sleep |
| 299031000000110 | COPD does not disturb sleep |
| 998281000006115 | Multiple COPD emergency hospital admissions |
| 475431013 | COPD |
| 555471000006114 | Chronic obstructive airways disease |
| 990641000006110 | COPD NOS |
| 285100019 | Emphysematous bronchitis |
| 640491000006111 | Emphysema |
| 301460019 | Chronic bullous emphysema |
| 301468014 | Chronic bullous emphysema NOS |
| 301477019 | Emphysema NOS |
| 457168017 | Mild COPD |
| 457169013 | Moderate COPD |
| 457171013 | Severe COPD |
| 516801000000112 | Very severe COPD |
| 216596014 | End stage chronic obstructive airways disease |
| 301539010 | Other specified chronic obstructive airways disease |
| 301545019 | Chronic obstructive airways disease NOS |
| 1222335015 | COPD NOS |
| 885311000006116 | COPD NOS |
| 301572010 | Chronic emphysema due to chemical fumes |
| 851261000006116 | Chronic bronchitis, acute exacerbation |
| 2160051010 | Admit COPD emergency |
| 990651000006112 | Chronic airway obstruction NOS |
| 105519017 | Chronic bronchitis |
| 508561017 | Simple chronic bronchitis |
| 508562012 | Chronic catarrhal bronchitis |
| 301444018 | Simple chronic bronchitis NOS |
| 123588010 | Mucopurulent chronic bronchitis |
| 885281000006118 | Mucopurulent chronic bronchitis |
| 506053014 | Purulent chronic bronchitis |
| 139979010 | Fetid chronic bronchitis |
| 301448015 | Mucopurulent chronic bronchitis NOS |
| 285104011 | Obstructive chronic bronchitis |
| 301451010 | Chronic wheezy bronchitis |
| 301453013 | AECOPD |
| 301455018 | Obstructive chronic bronchitis NOS |
| 301456017 | Mixed simple and mucopurulent chronic bronchitis |
| 301457014 | Other chronic bronchitis |
| 87480013 | Chronic tracheobronchitis |
| 301458016 | Other chronic bronchitis NOS |
| 301459012 | Chronic bronchitis NOS |
| 301463017 | Segmental bullous emphysema |
| 301464011 | Zonal bullous emphysema |
| 27096010 | Giant bullous emphysema |
| 396108018 | Bullous emphysema with collapse |
| 9337016 | Panlobular emphysema |
| 113497011 | Centrilobular emphysema |
| 301469018 | Other emphysema |
| 301470017 | Acute vesicular emphysema |
| 396109014 | Atrophic (senile) emphysema |
| 1230190015 | MacLeod's unilateral emphysema |
| 396110016 | Other emphysema NOS |
| 161781000006116 | Sawyer – Jones syndrome |
| 1222334016 | Other specified COPD |
| 555461000006119 | COPD with acute lower respiratory infection |
| 553211000006119 | COPD with acute exacerbation, unspecified |
| 885301000006119 | Chronic airway obstruction NOS |
| 301835010 | [X]Other emphysema |
| 301836011 | [X]Other specified COPD |
| 1763751000006117 | GP out of hours notified of COPD care plan |

A&E, accident and emergency; AECOPD, acute exacerbation of COPD; COPD, chronic obstructive pulmonary disease; GOLD, Global Initiative for Chronic Obstructive Lung Disease; GP, general practitioner; NOS, nitric oxide synthase; RFC, residual functional capacity

**Supplementary Table 2**. Baseline demographics and clinical characteristics by cohort and by index LAMA/LABA treatment for incident users and IMT users cohort

|  | **Incident users** | | | | **IMT users** | | | |
| --- | --- | --- | --- | --- | --- | --- | --- | --- |
| **ACL/FF (N=2,344)** | **IND/GLY (N=1,999)** | **TIO/OLO (N=1,333)** | **UMEC/VI (N=5,315)** | **ACL/FF (N=558)** | **IND/GLY (N=392)** | **TIO/OLO (N=358)** | **UMEC/VI (N=1,655)** |
| **Age at index, years, mean (SD)** | 69.4 (10.3) | 69.4 (10.2) | 69.6 (10.3) | 69.6 (10.6) | 68.8 (10.1) | 69.4 (10.5) | 69.4 (10.5) | 68.3 (10.8) |
| **Female, n (%)** | 979 (41.8) | 926 (46.3) | 638 (47.9) | 2,335 (43.9) | 219 (39.3) | 169 (43.1) | 164 (45.8) | 723 (43.7) |
| **Region, n (%)**  North East  North West  Yorkshire & The Humber  East Midlands  West Midlands  East of England  South West  South Central  London  South East Coast | 60 (2.6)  266 (11.4)  88 (3.8)  70 (3.0)  602 (25.7)  55 (2.4)  508 (21.7)  239 (10.2)  278 (11.9)  178 (7.6) | 270 (13.5)  460 (23.0)  122 (6.1)  16 (0.8)  146 (7.3)  90 (4.5)  376 (18.8)  86 (4.3)  238 (11.9)  195 (9.8) | 141 (10.6)  349 (26.2)  87 (6.5)  13 (1.0)  71 (5.3)  41 (3.1)  253 (19.0)  251 (18.8)  60 (4.5)  67 (5.0) | 112 (2.1)  996 (18.7)  541 (10.2)  57 (1.1)  957 (18.0)  176 (3.3)  1,271 (23.9)  630 (11.9)  307 (5.8)  268 (5.0) | 10 (1.8)  58 (10.4)  34 (6.1)  10 (1.8)  161 (28.9)  12 (2.2)  111 (19.9)  40 (7.2)  85 (15.2)  37 (6.6) | 53 (13.5)  90 (23.0)  37 (9.4)  NRa NRa  23 (5.9)  75 (19.1)  21 (5.4)  39 (10.0)  35 (8.9) | 58 (16.2)  73 (20.4)  28 (7.8)  NRa 15 (4.2)  NRa  71 (19.8)  80 (22.4)  12 (3.4)  13 (3.6) | 16 (1.0)  287 (17.3)  245 (14.8)  15 (0.9)  239 (14.4)  53 (3.2)  444 (26.8)  194 (11.7)  75 (4.5)  87 (5.3) |
| **BMI, kg/m2b**  *n*  mean (SD) | *2,044*  27.8 (6.6) | *1,776*  27.6 (6.9) | *1,203*  27.5 (6.5) | *4,645*  27.7 (6.6) | *460*  27.7 (6.3) | *325*  27.4 (7.3) | *310*  27.1 (6.9) | *1,364*  27.4 (6.9) |
| **FEV1 % predictedc**  *n*  mean (SD) | *1,893*  60.2 (17.7) | *1,522*  60.7 (17.6) | *1,078*  61.1 (17.7) | *4,155*  60.5 (17.5) | *436*  58.9 (18.0) | *276*  58.9 (17.4) | *281*  61.1 (16.6) | *1,297*  59.2 (17.8) |
| **FEV1/FVC ratioc**  *n*  mean (SD) | *1,738*  58.4 (13.1) | *1,489*  59.1 (13.3) | *1,014*  59.0 (12.7) | *4,108*  58.8 (12.7) | *431*  57.9 (12.1) | *279*  59.2 (13.6) | *277*  57.5 (12.1) | *1,320*  57.5 (11.6) |
| **Smoking status, n (%)b**  Current smoker  Former smoker  Non-smoker  Unknown | 915 (39.0)  1,211 (51.7)  56 (2.4)  162 (6.9) | 886 (44.3)  929 (46.5)  41 (2.1)  143 (7.2) | 554 (41.6)  629 (47.2)  39 (2.9)  111 (8.3) | 2,159 (40.6)  2,611 (49.1)  103 (1.9)  442 (8.3) | 233 (41.8)  273 (48.9)  8 (1.4)  44 (7.9) | 192 (49.0)  175 (44.6)  5 (1.3)  20 (5.1) | 162 (45.3)  158 (44.1)  6 (1.7)  32 (8.9) | 748 (45.2)  754 (45.6)  31 (1.9)  122 (7.4) |
| **mMRC Dyspnea scale score, n (%)c**  1d  2  3  4  5e  Unknown | 269 (11.5)  905 (38.6)  508 (21.7)  195 (8.3)  26 (1.1)  441 (18.8) | 238 (11.9)  654 (32.7)  567 (28.4)  199 (10.0)  27 (1.4)  314 (15.7) | 144 (10.8)  488 (36.6)  316 (23.7)  115 (8.6)  19 (1.4)  251 (18.8) | 641 (12.1)  1970 (37.1)  1125 (21.2)  358 (6.7)  32 (0.6)  1,189 (22.4) | 65 (11.7)  151 (27.1)  65 (11.7)  NRa  NRa 253 (45.3) | 49 (12.5)  94 (24.0)  64 (16.3)  23 (5.9)  6 (1.5)  156 (39.8) | 38 (10.6)  78 (21.8)  61 (17.0)  NRa  NRa  156 (43.6) | 191 (11.5)  444 (26.8)  199 (12.0)  NRa  NRa  767 (46.3) |
| **Comorbidities, mean (SD)** | 1.77 (1.43) | 1.88 (1.44) | 1.86 (1.46) | 1.79 (1.45) | 1.67 (1.38) | 1.75 (1.43) | 1.81 (1.37) | 1.67 (1.45) |
| **Comorbiditiesf, n (%)**  Depression  Anxiety  GERD  Acute myocardial infarction  Congestive heart failure  Stroke  Bronchiectasis  Dementia/cognitive impairment  Rheumatoid/osteoarthritis | 920 (39.3)  615 (26.2)  522 (22.3)  261 (11.1)  273 (11.7)  247 (10.5)  66 (2.8)  264 (11.3)  980 (41.8) | 864 (43.2)  562 (28.1)  488 (24.4)  253 (12.7)  246 (12.3)  249 (12.5)  59 (3.0)  208 (10.4)  824 (41.2) | 562 (42.2)  368 (27.6)  303 (22.7)  163 (12.2)  165 (12.4)  184 (13.8)  44 (3.3)  141 (10.6)  548 (41.1) | 2,223 (41.8)  1,370 (25.8)  1,197 (22.5)  640 (12.0)  650 (12.2)  691 (13.0)  152 (2.9)  504 (9.5)  2,095 (39.4) | 204 (36.6)  133 (23.8)  119 (21.3)  55 (9.9)  54 (9.7)  58 (10.4)  11 (2.0)  62 (11.1)  237 (42.5) | 160 (40.8)  98 (25.0)  82 (20.9)  44 (11.2)  50 (12.8)  43 (11.0)  8 (2.0)  42 (10.7)  160 (40.8) | 147 (41.1)  94 (26.3)  76 (21.2)  41 (11.5)  41 (11.5)  50 (14.0)  10 (2.8)  42 (11.7)  148 (41.3) | 676 (40.9)  403 (24.4)  329 (19.9)  186 (11.2)  182 (11.0)  205 (12.4)  39 (2.4)  132 (8.0)  618 (37.3) |
| **Current asthma diagnosisg, n (%)** | 352 (15.0) | 278 (13.9) | 183 (13.7) | 676 (12.7) | 62 (11.1) | 37 (9.4) | 30 (8.4) | 145 (8.8) |
| **GOLD 2019 grouph, n (%)**  A  B  C  D | 826 (46.8)  500 (25.9)  251 (13.0)  355 (18.4) | 575 (33.5)  533 (31.0)  228 (13.3)  383 (22.3) | 458 (41.3)  301 (27.1)  127 (11.5)  223 (20.1) | 1,852 (43.8)  1,016 (24.0)  564 (13.3)  797 (18.9) | 147 (46.2)  64 (20.1)  58 (18.2)  49 (15.4) | 86 (34.8)  64 (25.9)  40 (16.2)  57 (23.1) | 91 (41.0)  57 (25.7)  18 (8.1)  56 (25.2) | 454 (48.1)  169 (17.9)  141 (15.0)  180 (19.1) |
| **Moderate-to-severe AECOPDsi**  Patients with AECOPD, n (%)  Mean (SD)  **Moderate AECOPDsi**  Patients with AECOPD, n (%)  Mean (SD)  **Severe AECOPDsi**  Patients with AECOPD, n (%)  Mean (SD) | 732 (31.2)  0.4 (0.8)  619 (26.4)  0.4 (0.7)  140 (6.0)  0.7 (0.3) | 702 (35.1)  0.5 (0.8)  549 (27.5)  0.4 (0.7)  210 (10.5)  0.1 (0.4) | 425 (31.2)  0.4 (0.8)  330 (24.8)  0.3 (0.7)  127 (9.5)  0.1 (0.4) | 1,662 (31.3)  0.4 (0.7)  1,361 (25.6)  0.3 (0.7)  404 (7.6)  0.1 (0.3) | 164 (29.4)  0.4 (0.7)  138 (24.7)  0.3 (0.7)  28 (5.0)  0.1 (0.2) | 138 (35.2)  0.5 (0.7)  107 (27.3)  0.3 (0.6)  40 (10.2)  0.1 (0.4) | 113 (31.6)  0.4 (0.8)  84 (23.5)  0.3 (0.7)  38 (10.6)  0.1 (0.4) | 494 (29.9)  0.4 (0.7)  410 (24.8)  0.3 (0.6)  105 (6.3)  0.1 (0.3) |
| **Blood eosinophil countj, cells/µL**  *n*  Mean (SD) | *1,299*  0.2 (0.2) | *1,159*  0.2 (0.1) | *760*  0.2 (0.2) | *2,958*  0.2 (0.2) | *309*  0.2 (0.1) | *241*  0.2 (0.1) | *220*  0.2 (0.2) | *941*  0.2 (0.2) |

aResults based on small numbers of patients (n<5) were suppressed, as well as the next-smallest value to protect primary suppression.
bmost recent score/status at any time in a patient’s history prior to and including index; cmost recent score in the 24 months prior to index; **d**not troubled by breathlessness except on strenuous exercise; **e**too breathless to leave the house; **f**present, prior to and including index; **g**in the 24 months prior to and including index; **hi**a composite measure of COPD severity using AECOPD events in the prior 12 months and the most recent MRC measurement in the 24 months prior to and including the index date (A: ≤1 moderate exacerbation in 12 months and MRC 1–2, B: ≤1 moderate exacerbation in 12 months and MRC ≥3, C: ≥2 moderate/severe OR ≥1 severe exacerbation in 12 months and MRC 1–2, D: ≥2 moderate/severe OR ≥1 severe exacerbation in 12 months and MRC ≥3); iin the 12 months to prior and including index date;jmost recent measurement in the 12 months prior to and including index.

ACL, aclidinium; AECOPD, acute exacerbations of COPD; BMI, body mass index; COPD, chronic obstructive pulmonary disorder; FEV1, forced expiratory volume; FF, formoterol fumarate; FVC, forced vital capacity; GERD, gastroesophageal reflux disease; GOLD, Global Initiative for Chronic Obstructive Lung Disease; GLY, glycopyrronium; IMT, initial maintenance therapy; IND, indacaterol; MRC, Medical Research Council; NR, not reported; OLO, olodaterol; SD, standard deviation; TIO, tiotropium bromide; UMEC, umeclidinium; VI, vilanterol.

**Supplementary Table 3.** Proportion of patients with all-cause HCRU during the baseline period (non-triple users cohort)

|  | **Overall (N=9,888)** | **ACL/FF (N=2,109)** | **IND/GLY (N=1,785)** | **TIO/OLO (N=1,189)** | **UMEC/VI (N=4,805)** |
| --- | --- | --- | --- | --- | --- |
| **12-month baseline period** | | | | | |
| **Prescriptions, n (%)** | 9,707 (98.5) | 2,069 (98.3) | 1,759 (98.71) | 1,167 (98.7) | 4,712 (98.5) |
| **GP consultations, n (%)** | 9,822 (99.3) | 2,099 (99.5) | 1,769 (99.10) | 1,184 (99.6) | 4,770 (99.3) |
| **Outpatient visits, n (%)** | 6,691 (67.7) | 1,425 (67.6) | 1,264 (70.81) | 811  (68.2) | 3,191 (66.4) |
| **Inpatient stays, n (%)** | 3,389 (34.3) | 695  (33.0) | 675 (37.82) | 439  (36.9) | 1,580 (32.9) |
| **A&E visits, n (%)** | 2,836 (28.7) | 524  (24.9) | 610 (34.2) | 374  (31.5) | 1,328 (27.6) |
| **1 day to ≤3 months prior to index** | | | | | |
| **Prescriptions, n (%)** | 9,318 (94.6) | 1,989 (94.5) | 1,697 (95.2) | 1,121 (94.8) | 4,511 (94.3) |
| **GP consultations, n (%)** | 8,801 (89.0) | 1,882 (89.2) | 1,594 (89.3) | 1,070 (90.0) | 4,255 (88.6) |
| **Outpatient visits, n (%)** | 4,375 (44.3) | 936  (44.4) | 843  (47.2) | 531  (44.7) | 2,065 (43.0) |
| **Inpatient stays, n (%)** | 1,452 (14.7) | 268  (12.7) | 321  (18.0) | 190  (16.0) | 673  (14.0) |
| **A&E visits, n (%)** | 1,234 (12.5) | 213  (10.1) | 292  (16.4) | 159  (13.4) | 570  (11.9) |

A&E, accident and emergency; ACL, aclidinium; FF, formoterol fumarate; IND, indacaterol; GLY, glycopyrronium; GP, general practitioner; HCRU, healthcare resource use; OLO, olodaterol; TIO, tiotropium bromide; UMEC, umeclidinium; VI, vilanterol.

**Supplementary Table 4**. Cumulative length of inpatient stays during the baseline period (non-triple users cohort)

|  | **Overall (n=9,888)** | **ACL/FF (n=2,109)** | **IND/GLY (n=1,785)** | **TIO/OLO (n=1,189)** | **UMEC/VI (n=4,805)** |
| --- | --- | --- | --- | --- | --- |
| **12-month baseline period** | | | | | |
| **Cumulative length of COPD-related inpatient stays, days, mean (SD)** | n=2,117 | n=406 | n=465 | n=280 | n=966 |
| 5.37 (11.26) | 4.04 (8.17) | 6.03 (11.27) | 6.06 (12.62) | 5.4  (11.9) |
| **Cumulative length of all-cause inpatient stays, days, mean (SD)** | n=3,389 | n=695 | n=675 | n=439 | n=1,580 |
| 4.92 (12.65) | 3.83 (9.34) | 5.73 (12.88) | 5.69 (13.94) | 4.84 (13.38) |
| **1 day to ≤3 months prior to index** | | | | | |
| **Cumulative length of COPD-related inpatient stays, days, mean (SD)** | n=1,008 | n=174 | n=248 | n=133 | n=453 |
| 4.84 (8.30) | 3.79 (7.20) | 5.27 (8.43) | 5.53 (8.23) | 4.81 (8.61) |
| **Cumulative length of all-cause inpatient stays, days, mean (SD)** | n=1,452 | n=268 | n=321 | n=190 | n=673 |
| 3.95 (7.62) | 3.14 (6.53) | 4.62 (8.01) | 4.41 (7.53) | 3.82 (7.82) |

ACL, aclidinium; COPD, chronic obstructive pulmonary disorder; FF, formoterol fumarate; IND, indacaterol; GLY, glycopyrronium; OLO, olodaterol; SD, standard deviation; TIO, tiotropium bromide; UMEC, umeclidinium; VI, vilanterol.
